# Supplementary material
Source: PubMed Central journal article supplement (PMC5138152)
Supplement: NIHMS758069-supplement-1.pdf [file NIHMS758069-supplement-1.pdf]

# **Alcohol Affects Brain Functional Connectivity and its Coupling with Behavior: Greater Effects in Male Heavy Drinkers**

## **(Supplementary Information)**

Ehsan Shokri-Kojori<sup>1\*</sup>, PhD

Dardo Tomasi<sup>1</sup>, PhD

Corinde E. Wiers<sup>1</sup>, PhD

Gene-Jack Wang<sup>1</sup>, MD

Nora D. Volkow<sup>1,2</sup>, MD

<sup>1</sup>National Institute on Alcohol Abuse and Alcoholism;

<sup>2</sup>National Institute on Drug Abuse;

National Institutes of Health, Bethesda, MD, USA.

\*To whom correspondence should be addressed:

Ehsan Shokri Kojori, PhD

Laboratory of Neuroimaging  
National Institute on Alcohol Abuse and Alcoholism  
National Institutes of Health  
10 CENTER DR, RM B2L124, MSC 1013  
BETHESDA, MD 20892-1013  
Phone: 301-451-3020  
Fax: 301-496-5568  
Email: ehsan.shokrikojori@nih.gov

## Supplementary Results

### Between-Subject Correlations in FCD

High pairwise between-subject correlations in NM in PLC (Fig. 5a) were observed between and PFC IFCD and Calcarine gFCD ( $r(22) = 0.83, p < 0.0001$ ), and between Cerebellum IFCD and Cerebellum gFCD ( $r(22) = 0.88, p < 0.0001$ ). Both effects were also significant after removing the effect of other ROIs ( $p < 0.0001$ ). In addition, there was a significant correlation between Thalamus (MDN) IFCD and Cerebellum gFCD ( $r(22) = 0.64, p = 0.0008$ ) and between Thalamus (MDN) IFCD and Thalamus (VLN) IFCD ( $r(22) = 0.77, p < 0.0001$ ). NM in ALC (Fig. 5c) condition showed significant correlation between Thalamus (MDN) IFCD and Thalamus (VLN) IFCD ( $r(22) = 0.88, p < 0.0001$ ), which was also significant after removing the effect of other ROIs. In addition, PFC IFCD and Thalamus (VLN) gFCD were correlated ( $r(22) = 0.87, p < 0.0001$ ). HD in PLC condition (Fig. 5b) showed significant correlations between Cerebellum IFCD and Cerebellum gFCD ( $r(14) = 0.92, p < 0.0001$ ), and between PFC IFCD and Cerebellum gFCD ( $r(14) = 0.79, p < 0.0001$ ). In ALC condition (Fig. 5d), HD showed significant Cerebellum IFCD and Cerebellum gFCD correlation ( $r(14) = 0.98, p < 0.0001$ ), which was significant after removing the effect of other ROIs. Moreover, there was a significant correlation between Calcarine IFCD and Precuneus IFCD ( $r(14) = 0.86, p < 0.0001$ ). Finally, similar to NM in ALC, there was a significant correlation between Thalamus (MDN) IFCD and Thalamus (VLN) IFCD ( $r(22) = 0.91, p < 0.0001$ ) in HD in ALC. Average  $R^2$  of the off-diagonal elements in the correlation matrix seemed lower in NM ( $R^2 = 0.14$ ; Fig. 5a) relative to HD ( $R^2 = 0.24$ ; Fig. 5b) in the PLC condition, which indicates the individual differences in FCD indices within the ROIs are more consistent in the HD relative to NM. Alcohol appeared to marginally

decrease average  $R^2$  of between-subject correlations in NM ( $R^2 = 0.034$ , Fig. 5c) and HD ( $\Delta R^2 = 0.013$ , Fig. 5d).

We assessed significant changes ( $p < 0.005$ ) in the correlation coefficients between PLC and ALC conditions (Fig. 5e–f). In NM (Fig. 5e), alcohol decreased between-subject correlations between Calcarine IFCD and Calcarine gFCD ( $z = -2.84$ ,  $p = 0.002$ ), and between Calcarine IFCD and Thalamus (VLN) IFCD after removing effect of other ROIs ( $z = -2.61$ ,  $p = 0.005$ ). ALC relative to PLC increased partial correlations between Calcarine gFCD and Thalamus (VLN) gFCD ( $z = 2.95$ ,  $p = 0.001$ ), between Cerebellum IFCD and Calcarine gFCD ( $z = 2.60$ ,  $p = 0.004$ ), and between Calcarine IFCD and Thalamus (MDN) IFCD ( $z = 2.91$ ,  $p = 0.002$ ). ALC relative to PLC also increased pairwise correlation between Calcarine gFCD and Thalamus (VLN) gFCD ( $z = 3.62$ ,  $p = 0.0001$ ) in NM. In HD (Fig. 5f), there were significant alcohol induced decreases in the partial correlation between Cerebellum IFCD and Thalamus (VLN) gFCD ( $z = -2.71$ ,  $p = 0.003$ ) and between Thalamus (VLN) IFCD and Thalamus (VLN) gFCD ( $z = -3.43$ ,  $p = 0.0003$ ). ALC relative to PLC also decreased the pairwise correlation between Cerebellum IFCD and Thalamus (MDN) IFCD ( $z = -2.58$ ,  $p = 0.005$ ) in HD. Alcohol induced increases in partial correlations were seen between Precuneus IFCD and Thalamus (VLN) gFCD ( $z = 3.04$ ,  $p = 0.001$ ), between Thalamus (MDN) IFCD and Thalamus (VLN) gFCD ( $z = 3.81$ ,  $p < 0.0001$ ), and between Cerebellum IFCD and Cerebellum gFCD ( $z = 3.61$ ,  $p = 0.0001$ ).

### **Associations between Behavior and FCD**

In NM in PLC condition (Supp. Table 5), there were significant correlations between Calcarine and Cerebellum ROIs' IFCD and gFCD and motor tasks ( $p < 0.01$ , two-tailed). In general, higher FCDs in Calcarine and Cerebellum ROIs were correlated with more errors on these ( $r(21) > 0.54$ ,  $p < 0.01$ ), however, Romberg time was negatively correlated with Calcarine IFCD and

gFCD ( $r(21) < -0.58, p < 0.01$ ). This indicates that increased Calcarine and Cerebellum FCDs predicts a speed-accuracy trade-off for motor functions. During alcohol intoxication in NM (Supp. Table 6) the number of significant correlation was reduced (8 in PLC to 2 in ALC). Significant (and positive) correlations were observed between Posterior Cingulate and Irritability ( $r(21) = 0.57$ ) and PFC IFCD and number of errors in the Romberg task ( $r(21) = 0.58$ ).

In HD in PLC (Supp. Table 7), similar to NM, more errors (e.g., One Leg task) were positively correlated with increase in Cerebellum IFCD ( $r(13) = 0.86$ ), and higher Cerebellum FCDs as well as higher Calcarine gFCD were negatively correlated with motor time ( $r(13) < -0.70$ ). Calcarine IFCD was positively correlated with feeling pleasant ( $r(13) = 0.67$ ). Posterior Cingulate IFCD was correlated with performance on SDMT task ( $r(13) = 0.75$ ). During alcohol intoxication in HD (Supp. Table 8), increase in PFC IFCD was associated with more motor errors (e.g., One Leg task,  $r(13) = 0.81$ ). Stroop (Incongruent) task performance, however, was positively correlated with Cerebellum IFCD and gFCD ( $r(13) > 0.68$ ), which might indicated higher Cerebellum FCDs might be as a compensatory phenomenon but only for higher cognitive abilities such as conflict resolution and inhibition, in HD under intoxication. Cerebellum gFCD also correlated with performance on Stroop Incongruent condition ( $r(13) = 0.69$ ). Finally, higher Calcarine gFCD and Thalamus (VLN) gFCD were associated with better SDMT performance ( $r(13) > 0.67$ ).

We also assessed the correlations between changes in behavioral measures and changes in ROI FCDs, between PLC and ALC conditions (i.e., ALC-PLC) in NM (Supp. Table 9) and HD (Supp. Table 10). In NM, Calcarine IFCD increases predicted higher sedated feelings ( $r(21) = 0.81, p < 0.01$ ). Precuneus IFCD increases negatively correlated with desire for alcohol ( $r(21) = -0.59, p < 0.01$ ), and Posterior Cingulate IFCD increases was associated with less Rhythm

errors. In HD, increases in Cerebellum gFCD from PLC to ALC was associated with decreases in Stroop (Incongruent) scores ( $r(13) = 0.81, p < 0.01$ ).

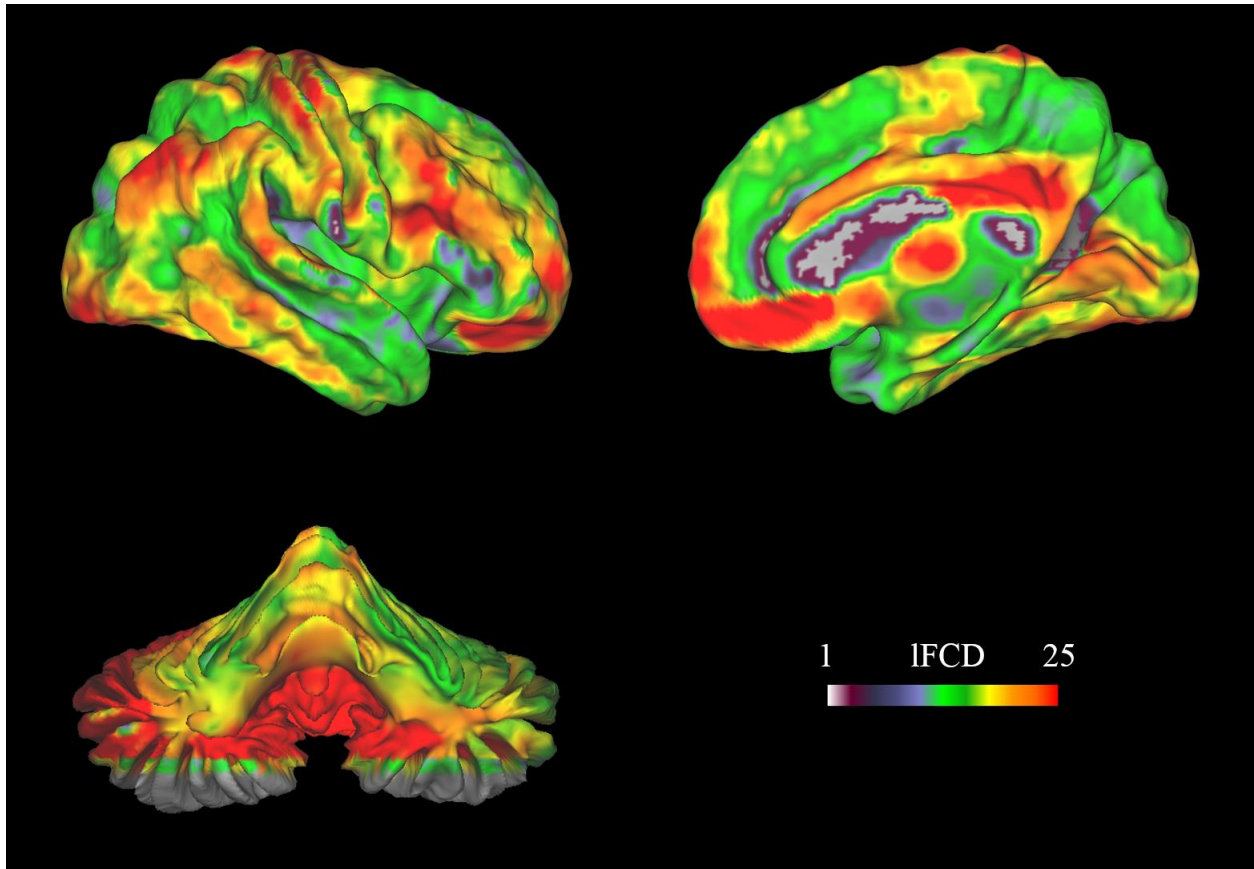

**Supplementary Figure 1.** Spatial distribution of the average IFCD across all the subjects in the baseline (PLC) condition with main IFCD hubs located within the posterior cingulate, ventral precuneus, inferior parietal cortex, cuneus, anterior PFC, and cerebellum.

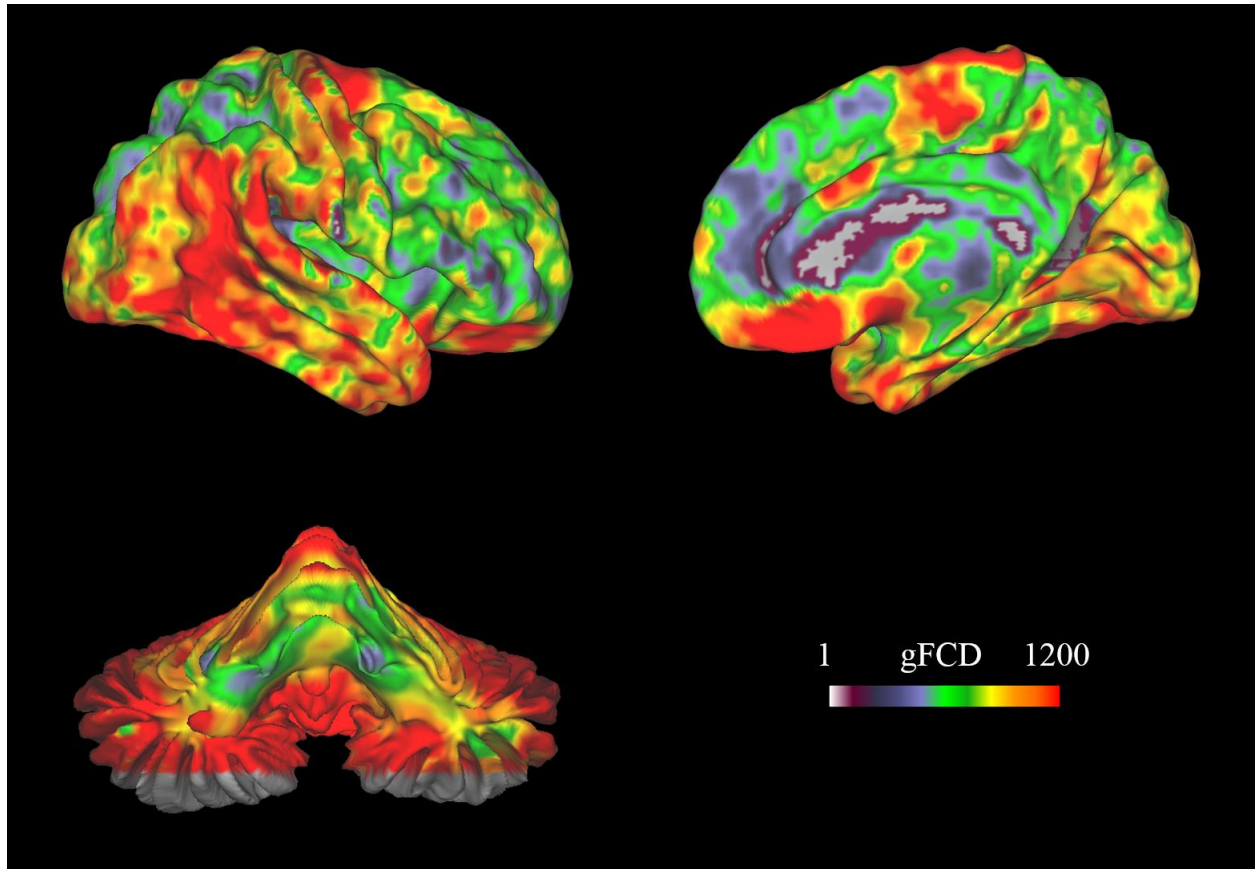

**Supplementary Figure 2.** Spatial distribution of the average gFCD across all the subjects in the baseline (PLC) condition with main gFCD hubs located within visual cortex, postcentral gyrus, precuneus, inferior parietal cortex, temporal lobe, and cerebellum.

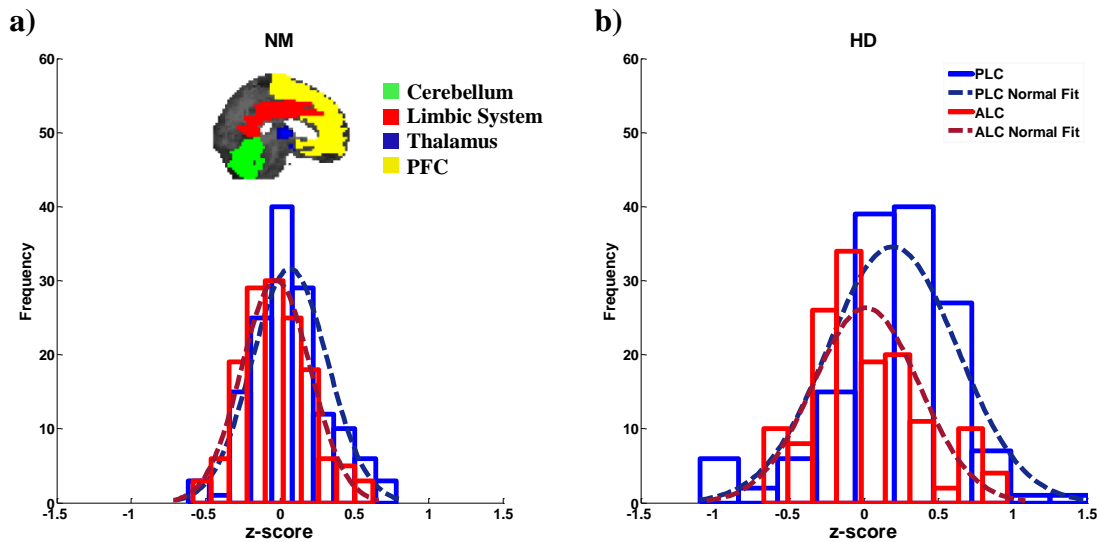

**Supplementary Figure 3.** Neurocognitive coupling analysis with a priori ROIs. We repeated the neurocognitive coupling analysis with 4 a priori ROIs. Specifically, we used the Talairach Daemon atlas<sup>1,2</sup> to create masks of cerebellum, prefrontal cortex (PFC), thalamus (and hypothalamus), and limbic system with known sensitivity to acute or chronic effects of alcohol.<sup>3-8</sup> Next, we extracted average local functional connectivity density (lFCD) and average global functional connectivity density (gFCD) within these masks, resulting in a total of 8 FCD values per participant. We estimated Pearson's correlation coefficients between performance on the 18 behavioral tasks with significant Group or Alcohol effects (see Supp. Tables 1–2 for list of significant behavioral measures) and the 8 FCDs (4 lFCD and 4 gFCD values obtained from the a priori ROIs), resulting in  $18 \times 8$  correlations per group and condition. **(a)** The distribution histogram of Fisher's  $z$ -transformed correlations for normal controls (NM) in Placebo (PLC) and Alcohol (ALC) conditions. **(b)** The distribution histogram of Fisher's  $z$ -transformed correlations for heavy drinkers (HD) in Placebo (PLC) and Alcohol (ALC) conditions. A two-way repeated measures ANOVA on the Fisher's  $z$ -transformed correlations showed a significant main effect of Alcohol ( $F(1, 143) = 32.58; p < 0.0001$ ) and a significant interaction between Alcohol and Group on the neurocognitive coupling ( $F(1, 143) = 3.90; p = 0.05$ ). Additionally, there was a significant effect of Group ( $F(1, 143) = 7.68; p = 0.006$ ). Similar to results obtained with functional ROIs, the a priori ROI results showed that ALC relative to PLC reduced the neurocognitive coupling in both groups ( $M_{\text{PLC}} = 0.13, SD_{\text{PLC}} = 0.34; M_{\text{ALC}} = -0.01, SD_{\text{ALC}} = 0.29$ ). The interaction effect indicated that relative to PLC, the reduction in neurocognitive coupling after alcohol was more pronounced in HD ( $M_{\text{PLC}} = 0.19, SD_{\text{PLC}} = 0.43, M_{\text{ALC}} = 0.01, SD_{\text{ALC}} = 0.36$ ; Fig. 6b) than in NM ( $M_{\text{PLC}} = 0.07, SD_{\text{PLC}} = 0.25, M_{\text{ALC}} = -0.03, SD_{\text{ALC}} = 0.23$ ; Fig. 6a). Finally, the Group effect indicated that HD showed higher overall neurocognitive ( $M = 0.13, SD = 0.40$ ) than NM ( $M = 0.02, SD = 0.24$ ), indicating that between subject differences in FCD in regions closely related to alcohol effects is a stronger predictor of behavioral differences in HD than NM.



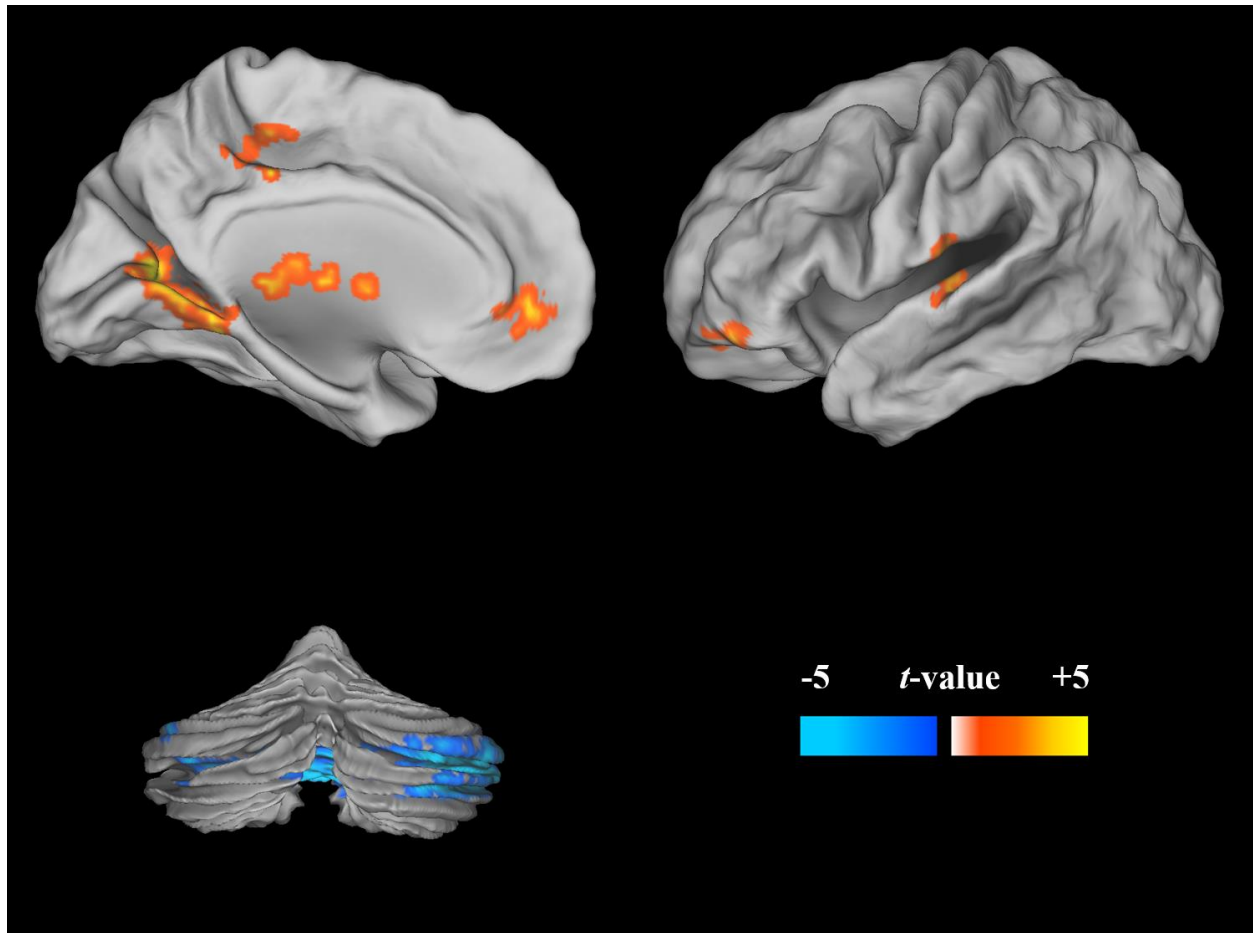

**Supplementary Figure 4.** Main effects of Group for local functional connectivity density (IFCD) for male participants only. Contrast involves Heavy Drinkers (HD) < Normal Controls (NM) superimposed on lateral and medial views of the cerebral surface and anterior view of the effect in the cerebellum ( $p_{\text{FWE}} < 0.05$ ). The effects are similar to results when females were included in the NM (Fig. 3) with Calcarine, Thalamus, Prefrontal Cortex, and Precuneus, also showing higher IFCD in male NM than male HD, and Cerebellum showing higher gFCD in male HD than male NM. The Posterior Cingulate cluster was not significant here after FWE correction.

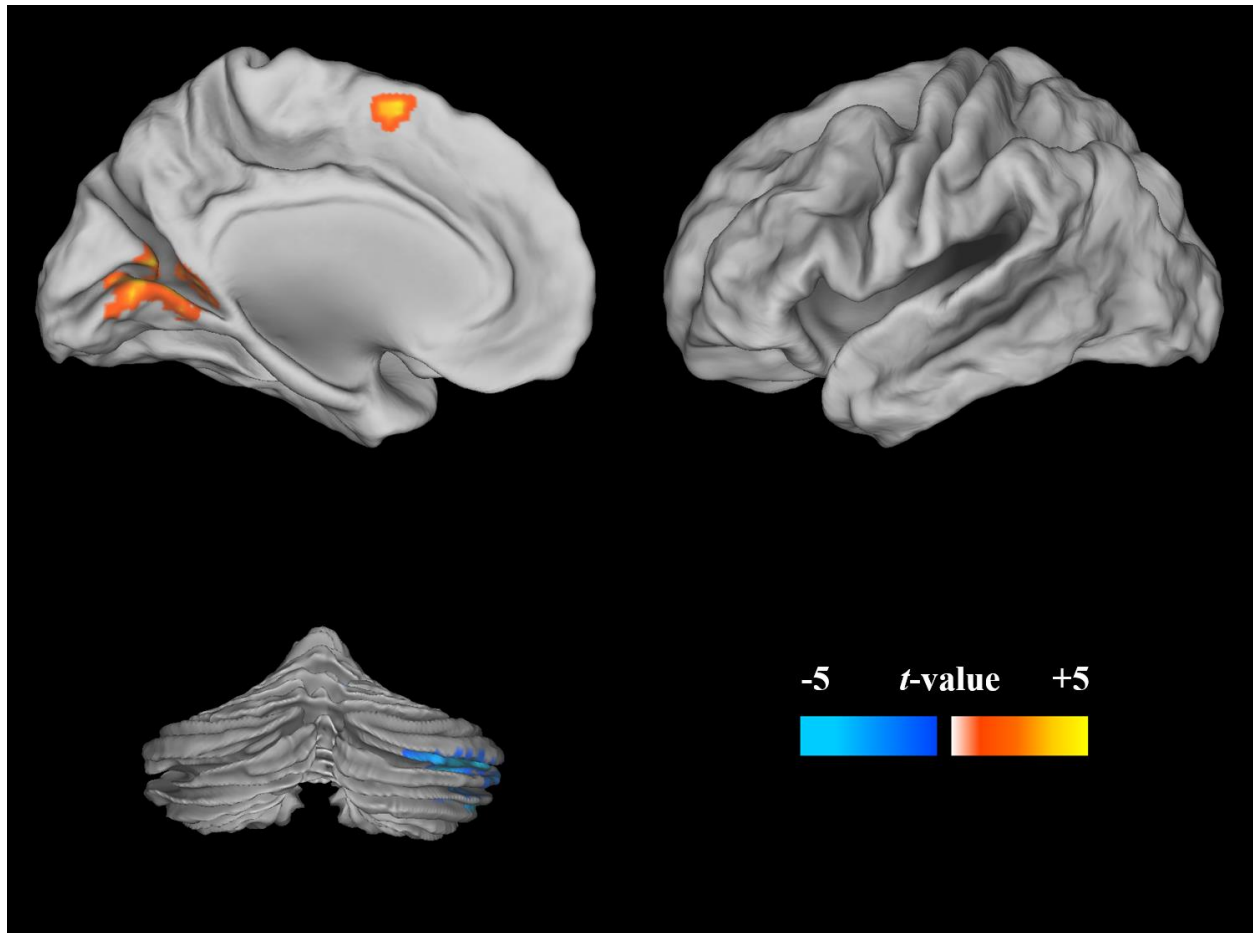

**Supplementary Figure 5.** Main effects of Group for global functional connectivity density (gFCD) for male participants only. Contrast involves Heavy Drinkers (HD) < Normal Controls (NM) superimposed on lateral and medial views of the cerebral surface and anterior view of the effect in the cerebellum ( $p_{FWE} < 0.05$ ). The effects are similar to results when females were included in the NM (Fig. 3) with Calcarine showing higher gFCD in male NM than male HD, and Cerebellum showing higher gFCD in male HD than male NM. We found an additional cluster in Superior Frontal Gyrus (BA 6) showing higher gFCD in NM than HD.

**Supplementary Table 1.** Main effect of Group on behavioral measures. Significant effects after correction for multiple comparisons ( $p_{FWE} < 0.05$ , Bonferroni) are in bold and italicized (\* for  $p < 0.05$ ; \*\* for  $p < 0.001$ ).

|                          | Name of Test                         | NM                   |                     | HD                  |                     | <i>F</i> (1, 36)    | <i>p</i> -value     |
|--------------------------|--------------------------------------|----------------------|---------------------|---------------------|---------------------|---------------------|---------------------|
|                          |                                      | <i>M</i>             | <i>SD</i>           | <i>M</i>            | <i>SD</i>           |                     |                     |
| Mood/Drug Effects        | Stimulated                           | 4.83                 | 0.76                | 4.77                | 0.78                | 0.02                | 0.880               |
|                          | Sedated                              | 2.63                 | 0.89                | 2.38                | 1.05                | 0.44                | 0.510               |
|                          | Self-confident                       | 7.35                 | 1.51                | 7.43                | 1.08                | 0.00                | 0.961               |
|                          | Social*                              | 7.42                 | 1.15                | 6.55                | 1.09                | 4.75                | 0.036               |
|                          | <b><i>Irritable**</i></b>            | <b><i>1.50</i></b>   | <b><i>0.63</i></b>  | <b><i>2.58</i></b>  | <b><i>1.54</i></b>  | <b><i>18.35</i></b> | <b><i>0.000</i></b> |
|                          | Dizzy                                | 2.10                 | 1.21                | 2.02                | 1.25                | 0.03                | 0.867               |
|                          | High                                 | 2.47                 | 1.43                | 2.47                | 0.95                | 0.50                | 0.483               |
|                          | Anxious                              | 1.46                 | 0.74                | 1.95                | 1.45                | 3.64                | 0.065               |
|                          | Pleasant                             | 5.00                 | 1.64                | 5.98                | 1.67                | 3.29                | 0.078               |
|                          | <b><i>Alcohol Desire**</i></b>       | <b><i>1.46</i></b>   | <b><i>0.92</i></b>  | <b><i>3.43</i></b>  | <b><i>2.33</i></b>  | <b><i>51.86</i></b> | <b><i>0.000</i></b> |
|                          | Control*                             | 9.36                 | 0.88                | 8.48                | 2.08                | 5.10                | 0.030               |
|                          | Intoxicated                          | 2.99                 | 1.19                | 2.88                | 1.06                | 0.03                | 0.861               |
| <b><i>Restless**</i></b> | <b><i>1.75</i></b>                   | <b><i>0.84</i></b>   | <b><i>3.08</i></b>  | <b><i>2.53</i></b>  | <b><i>20.51</i></b> | <b><i>0.000</i></b> |                     |
| Motor                    | Gait (time)                          | 16.46                | 4.62                | 17.69               | 5.00                | 2.80                | 0.103               |
|                          | Gait (errors)                        | 1.04                 | 0.57                | 0.80                | 0.71                | 0.76                | 0.390               |
|                          | One Leg (errors)                     | 1.23                 | 0.96                | 1.20                | 1.61                | 0.05                | 0.831               |
|                          | Romberg (time)                       | 29.54                | 7.87                | 30.29               | 4.86                | 0.83                | 0.369               |
|                          | Romberg (errors)                     | 1.52                 | 0.95                | 1.57                | 0.85                | 0.09                | 0.768               |
|                          | Rhythm (time)                        | 17.04                | 3.43                | 16.97               | 3.90                | 0.01                | 0.925               |
|                          | Rhythm (errors)                      | 0.85                 | 0.79                | 0.65                | 0.65                | 0.43                | 0.516               |
| Cognitive                | <b><i>Stroop (Neutral)**</i></b>     | <b><i>103.13</i></b> | <b><i>10.46</i></b> | <b><i>89.70</i></b> | <b><i>19.23</i></b> | <b><i>82.36</i></b> | <b><i>0.000</i></b> |
|                          | <b><i>Stroop (Congruent)**</i></b>   | <b><i>75.99</i></b>  | <b><i>9.28</i></b>  | <b><i>68.10</i></b> | <b><i>15.18</i></b> | <b><i>45.61</i></b> | <b><i>0.000</i></b> |
|                          | <b><i>Stroop (Incongruent)**</i></b> | <b><i>53.58</i></b>  | <b><i>9.52</i></b>  | <b><i>45.90</i></b> | <b><i>11.42</i></b> | <b><i>44.98</i></b> | <b><i>0.000</i></b> |
|                          | <b><i>SDMT**</i></b>                 | <b><i>46.34</i></b>  | <b><i>7.55</i></b>  | <b><i>42.10</i></b> | <b><i>8.92</i></b>  | <b><i>16.69</i></b> | <b><i>0.000</i></b> |
|                          | <b><i>Word Association**</i></b>     | <b><i>11.95</i></b>  | <b><i>3.70</i></b>  | <b><i>8.74</i></b>  | <b><i>3.48</i></b>  | <b><i>29.52</i></b> | <b><i>0.000</i></b> |

**Supplementary Table 2.** Main effect of Alcohol on behavioral measures. Significant effects after correction for multiple comparisons ( $p_{FWE} < 0.05$ , Bonferroni) are in bold and italicized (\* for  $p < 0.05$ ; \*\* for  $p < 0.001$ ).

|                                 | Name of Test                       | PLC                  |                     | ALC                 |                     | <i>F</i> (1, 36)    | <i>p</i> -value     |
|---------------------------------|------------------------------------|----------------------|---------------------|---------------------|---------------------|---------------------|---------------------|
|                                 |                                    | <i>M</i>             | <i>SD</i>           | <i>M</i>            | <i>SD</i>           |                     |                     |
| Mood/Drug Effects               | Stimulated                         | 4.99                 | 1.19                | 4.62                | 1.23                | 1.01                | 0.322               |
|                                 | <b><i>Sedated</i>**</b>            | <b><i>1.67</i></b>   | <b><i>1.18</i></b>  | <b><i>3.39</i></b>  | <b><i>1.80</i></b>  | <b><i>17.62</i></b> | <b><i>0.000</i></b> |
|                                 | Self-confident                     | 7.33                 | 1.90                | 7.43                | 1.59                | 0.65                | 0.427               |
|                                 | Social                             | 7.16                 | 1.58                | 7.00                | 1.66                | 0.06                | 0.803               |
|                                 | Irritable                          | 1.87                 | 1.50                | 1.99                | 1.41                | 0.01                | 0.941               |
|                                 | <b><i>Dizzy</i>**</b>              | <b><i>1.34</i></b>   | <b><i>0.86</i></b>  | <b><i>2.79</i></b>  | <b><i>2.16</i></b>  | <b><i>16.05</i></b> | <b><i>0.000</i></b> |
|                                 | <b><i>High</i>**</b>               | <b><i>1.28</i></b>   | <b><i>0.79</i></b>  | <b><i>3.66</i></b>  | <b><i>2.34</i></b>  | <b><i>33.31</i></b> | <b><i>0.000</i></b> |
|                                 | Anxious                            | 1.42                 | 0.84                | 1.88                | 1.56                | 3.09                | 0.087               |
|                                 | <b><i>Pleasant</i>**</b>           | <b><i>4.13</i></b>   | <b><i>2.83</i></b>  | <b><i>6.65</i></b>  | <b><i>2.16</i></b>  | <b><i>19.17</i></b> | <b><i>0.000</i></b> |
|                                 | Alcohol Desire                     | 1.96                 | 1.61                | 2.51                | 2.37                | 2.42                | 0.128               |
|                                 | Control*                           | 9.49                 | 1.86                | 8.54                | 1.81                | 6.17                | 0.018               |
|                                 | <b><i>Intoxicated</i>**</b>        | <b><i>1.17</i></b>   | <b><i>0.56</i></b>  | <b><i>4.72</i></b>  | <b><i>2.21</i></b>  | <b><i>74.90</i></b> | <b><i>0.000</i></b> |
| Restless                        | 2.17                               | 2.08                 | 2.38                | 1.89                | 0.23                | 0.633               |                     |
| Motor                           | Gait (time)*                       | 15.71                | 3.93                | 18.17               | 6.09                | 10.07               | 0.003               |
|                                 | <b><i>Gait (errors)**</i></b>      | <b><i>0.16</i></b>   | <b><i>0.35</i></b>  | <b><i>1.74</i></b>  | <b><i>1.18</i></b>  | <b><i>47.61</i></b> | <b><i>0.000</i></b> |
|                                 | <b><i>One Leg (errors)**</i></b>   | <b><i>0.25</i></b>   | <b><i>0.62</i></b>  | <b><i>2.18</i></b>  | <b><i>2.12</i></b>  | <b><i>29.22</i></b> | <b><i>0.000</i></b> |
|                                 | <b><i>Romberg (time)**</i></b>     | <b><i>27.90</i></b>  | <b><i>6.60</i></b>  | <b><i>31.80</i></b> | <b><i>7.60</i></b>  | <b><i>23.68</i></b> | <b><i>0.000</i></b> |
|                                 | <b><i>Romberg (errors)**</i></b>   | <b><i>0.20</i></b>   | <b><i>0.47</i></b>  | <b><i>2.88</i></b>  | <b><i>1.77</i></b>  | <b><i>59.40</i></b> | <b><i>0.000</i></b> |
|                                 | Rhythm (time)*                     | 16.24                | 3.12                | 17.78               | 4.43                | 10.24               | 0.003               |
| <b><i>Rhythm (errors)**</i></b> | <b><i>0.30</i></b>                 | <b><i>0.51</i></b>   | <b><i>1.24</i></b>  | <b><i>1.17</i></b>  | <b><i>26.07</i></b> | <b><i>0.000</i></b> |                     |
| Cognitive                       | <b><i>Stroop (Neutral)**</i></b>   | <b><i>100.00</i></b> | <b><i>16.95</i></b> | <b><i>95.25</i></b> | <b><i>15.59</i></b> | <b><i>13.77</i></b> | <b><i>0.001</i></b> |
|                                 | <b><i>Stroop (Congruent)**</i></b> | <b><i>75.50</i></b>  | <b><i>14.41</i></b> | <b><i>70.30</i></b> | <b><i>10.94</i></b> | <b><i>20.40</i></b> | <b><i>0.000</i></b> |
|                                 | Stroop (Incongruent)*              | 52.00                | 11.84               | 49.09               | 10.62               | 7.11                | 0.011               |
|                                 | <b><i>SDMT**</i></b>               | <b><i>47.24</i></b>  | <b><i>9.35</i></b>  | <b><i>42.10</i></b> | <b><i>8.14</i></b>  | <b><i>26.73</i></b> | <b><i>0.000</i></b> |
|                                 | <b><i>Word Association**</i></b>   | <b><i>12.10</i></b>  | <b><i>4.53</i></b>  | <b><i>9.30</i></b>  | <b><i>3.87</i></b>  | <b><i>21.89</i></b> | <b><i>0.000</i></b> |

**Supplementary Table 3.** Interaction effect between Group and Alcohol factors on behavioral measures. Significant effects after correction for multiple comparisons ( $p_{FWE} < 0.05$ , Bonferroni) are in bold and italicized.

|                          | Name of Test         | <i>F</i> (1, 36) | <i>p</i> -value |
|--------------------------|----------------------|------------------|-----------------|
| <b>Mood/Drug Effects</b> | Stimulated           | 0.01             | 0.922           |
|                          | Sedated              | 0.10             | 0.752           |
|                          | Self-confident       | 1.23             | 0.275           |
|                          | Social               | 0.09             | 0.767           |
|                          | Irritable            | 0.28             | 0.603           |
|                          | Dizzy                | 2.66             | 0.111           |
|                          | High                 | 0.35             | 0.556           |
|                          | Anxious              | 0.09             | 0.768           |
|                          | Pleasant             | 0.43             | 0.514           |
|                          | Alcohol Desire       | 0.01             | 0.905           |
|                          | Control              | 0.54             | 0.465           |
|                          | Intoxicated          | 0.17             | 0.687           |
| Restless                 | 1.08                 | 0.305            |                 |
| <b>Motor</b>             | Gait (time)          | 0.60             | 0.444           |
|                          | Gait (errors)        | 1.63             | 0.210           |
|                          | One Leg (errors)     | 0.54             | 0.468           |
|                          | Romberg (time)       | 0.00             | 0.970           |
|                          | Romberg (errors)     | 0.82             | 0.372           |
|                          | Rhythm (time)        | 0.49             | 0.487           |
|                          | Rhythm (errors)      | 1.74             | 0.196           |
| <b>Cognitive</b>         | Stroop (Neutral)     | 1.32             | 0.258           |
|                          | Stroop (Congruent)   | 0.99             | 0.326           |
|                          | Stroop (Incongruent) | 0.05             | 0.825           |
|                          | SDMT                 | 2.97             | 0.093           |
|                          | Word Association     | 1.25             | 0.271           |

**Supplementary Table 4.** ROI-level analysis of effects of Group and Alcohol on IFCD and gFCD while controlling for gender and smoking. The mean values are shown in Figs. 3–4.

|      | ROI                 | <u>Group</u>    |                 | <u>Alcohol</u>   |                 | <u>Group × Alcohol</u> |                 |
|------|---------------------|-----------------|-----------------|------------------|-----------------|------------------------|-----------------|
|      |                     | <i>F</i> (1,38) | <i>p</i> -value | <i>F</i> (1, 38) | <i>p</i> -value | <i>F</i> (1, 38)       | <i>p</i> -value |
| IFCD | Calcarine           | 96.22           | 0.000           | 0.23             | 0.635           | 0.05                   | 0.829           |
|      | Cerebellum          | 67.28           | 0.000           | 1.32             | 0.258           | 1.79                   | 0.188           |
|      | PFC                 | 30.30           | 0.000           | 0.15             | 0.705           | 0.02                   | 0.885           |
|      | Posterior Cingulate | 33.59           | 0.000           | 0.24             | 0.625           | 1.68                   | 0.203           |
|      | Precuneus           | 52.75           | 0.000           | 4.58             | 0.039           | 0.25                   | 0.619           |
|      | Thalamus (MDN)      | 51.46           | 0.000           | 8.81             | 0.005           | 1.59                   | 0.215           |
|      | Thalamus (VLN)      | 16.69           | 0.000           | 22.84            | 0.000           | 2.19                   | 0.148           |
|      | Whole Brain         | 0.29            | 0.593           | 0.18             | 0.671           | 1.21                   | 0.279           |
| gFCD | Calcarine           | 21.96           | 0.000           | 3.24             | 0.080           | 0.70                   | 0.409           |
|      | Cerebellum          | 46.96           | 0.000           | 1.47             | 0.232           | 2.55                   | 0.119           |
|      | Thalamus (VLN)      | 4.39            | 0.043           | 19.39            | 0.000           | 0.34                   | 0.563           |
|      | Whole Brain         | 0.09            | 0.760           | 0.96             | 0.334           | 2.81                   | 0.102           |

**Supplementary Table 5.** Correlation in PLC in 23 NM between 18 behavioral measures which showed significant effects of Group or Alcohol and 10 ROIs which showed significant effects of Group or Alcohol. Significant correlations are highlighted in green ( $p < 0.01$ , two-tailed).

| Name of Test | IFCD                 |            |       |                     |           |                |                | gFCD      |            |                |       |
|--------------|----------------------|------------|-------|---------------------|-----------|----------------|----------------|-----------|------------|----------------|-------|
|              | Calcarine            | Cerebellum | PFC   | Posterior Cingulate | Precuneus | Thalamus (MDN) | Thalamus (VLN) | Calcarine | Cerebellum | Thalamus (VLN) |       |
| Drug Effects | Sedated              | 0.21       | 0.32  | 0.18                | 0.01      | 0.15           | 0.28           | -0.03     | 0.46       | 0.42           | -0.01 |
|              | Irritable            | 0.34       | 0.30  | -0.03               | 0.12      | 0.22           | 0.18           | -0.10     | 0.54       | 0.27           | -0.01 |
|              | Dizzy                | 0.37       | 0.44  | 0.56                | 0.08      | 0.13           | 0.24           | 0.09      | 0.01       | 0.33           | -0.08 |
|              | High                 | 0.39       | 0.06  | 0.13                | 0.07      | -0.12          | 0.01           | 0.17      | 0.17       | -0.01          | -0.02 |
|              | Pleasant             | -0.09      | -0.20 | 0.39                | -0.18     | -0.27          | 0.10           | 0.37      | -0.15      | -0.06          | 0.31  |
|              | Alcohol Desire       | -0.12      | -0.08 | -0.20               | -0.21     | -0.10          | -0.16          | -0.34     | -0.08      | -0.02          | -0.18 |
|              | Intoxication         | 0.46       | -0.08 | 0.07                | 0.05      | -0.17          | -0.22          | -0.04     | 0.26       | -0.14          | -0.26 |
|              | Restless             | 0.37       | 0.04  | -0.03               | 0.02      | 0.17           | 0.14           | 0.30      | 0.23       | 0.02           | 0.07  |
| Motor        | Gait (errors)        | 0.32       | 0.63  | 0.54                | 0.39      | 0.08           | 0.48           | 0.10      | 0.13       | 0.56           | 0.07  |
|              | One Leg (errors)     | 0.19       | 0.53  | 0.09                | 0.14      | 0.34           | 0.44           | 0.09      | 0.28       | 0.39           | 0.42  |
|              | Romberg (time)       | -0.62      | -0.47 | 0.00                | -0.40     | 0.10           | -0.17          | 0.10      | -0.58      | -0.43          | 0.17  |
|              | Romberg (errors)     | 0.09       | 0.53  | 0.49                | 0.22      | -0.02          | 0.34           | 0.07      | -0.09      | 0.42           | -0.09 |
|              | Rhythm (errors)      | 0.56       | 0.07  | 0.18                | 0.28      | -0.19          | 0.02           | 0.10      | 0.28       | 0.11           | -0.12 |
| Cognitive    | Stroop (Neutral)     | -0.20      | -0.05 | 0.01                | -0.31     | -0.11          | -0.03          | 0.11      | -0.04      | 0.15           | -0.12 |
|              | Stroop (Congruent)   | -0.12      | -0.10 | -0.05               | -0.09     | -0.02          | 0.12           | 0.29      | 0.09       | -0.01          | 0.07  |
|              | Stroop (Incongruent) | -0.14      | -0.20 | 0.01                | -0.14     | -0.02          | 0.09           | 0.38      | -0.04      | -0.06          | 0.16  |
|              | SDMT                 | -0.31      | -0.13 | 0.19                | -0.35     | -0.02          | 0.03           | 0.16      | -0.18      | 0.06           | 0.00  |
|              | Word Association     | -0.20      | -0.17 | -0.10               | -0.42     | -0.17          | -0.32          | -0.38     | -0.23      | -0.26          | -0.24 |

**Supplementary Table 6.** Correlation coefficients in ALC in 23 NM between 18 behavioral measures which showed significant effects of Group or Alcohol and 10 ROIs which showed significant effects of Group or Alcohol. Significant correlations are highlighted in green ( $p < 0.01$ , two-tailed).

| Name of Test | IFCD                 |            |       |                     |           |                |                | gFCD      |            |                |       |
|--------------|----------------------|------------|-------|---------------------|-----------|----------------|----------------|-----------|------------|----------------|-------|
|              | Calcarine            | Cerebellum | PFC   | Posterior Cingulate | Precuneus | Thalamus (MDN) | Thalamus (VLN) | Calcarine | Cerebellum | Thalamus (VLN) |       |
| Drug Effects | Sedated              | 0.22       | 0.40  | 0.15                | 0.10      | -0.28          | 0.11           | 0.04      | -0.09      | 0.12           | -0.19 |
|              | Irritable            | 0.38       | -0.15 | -0.08               | 0.57      | 0.32           | 0.11           | 0.00      | -0.02      | -0.18          | 0.02  |
|              | Dizzy                | -0.06      | -0.15 | -0.01               | 0.14      | -0.05          | -0.16          | -0.07     | -0.28      | -0.20          | -0.29 |
|              | High                 | 0.38       | 0.02  | 0.22                | 0.48      | -0.05          | 0.29           | 0.15      | -0.16      | -0.09          | -0.29 |
|              | Pleasant             | -0.28      | -0.18 | -0.02               | -0.35     | 0.01           | -0.17          | -0.11     | -0.12      | -0.32          | -0.09 |
|              | Alcohol Desire       | -0.19      | -0.23 | -0.09               | -0.03     | -0.12          | 0.02           | 0.01      | -0.19      | -0.12          | -0.14 |
|              | Intoxication         | 0.25       | 0.13  | 0.08                | 0.44      | -0.05          | 0.30           | 0.14      | -0.19      | -0.14          | -0.24 |
|              | Restless             | 0.21       | -0.30 | -0.02               | 0.33      | 0.17           | 0.04           | -0.03     | -0.18      | -0.36          | -0.04 |
| Motor        | Gait (errors)        | 0.51       | -0.03 | 0.11                | 0.21      | -0.09          | 0.23           | 0.06      | 0.13       | -0.05          | 0.04  |
|              | One Leg (errors)     | -0.04      | 0.19  | 0.22                | -0.28     | 0.07           | 0.16           | 0.30      | 0.02       | 0.17           | -0.04 |
|              | Romberg (time)       | -0.53      | -0.26 | -0.04               | -0.51     | 0.00           | -0.35          | -0.06     | -0.12      | -0.07          | -0.07 |
|              | Romberg (errors)     | -0.04      | 0.25  | 0.58                | -0.04     | 0.08           | 0.24           | 0.28      | -0.06      | 0.27           | 0.00  |
|              | Rhythm (errors)      | 0.42       | 0.06  | -0.07               | 0.09      | 0.26           | 0.45           | 0.24      | 0.34       | 0.15           | 0.34  |
| Cognitive    | Stroop (Neutral)     | -0.25      | 0.20  | 0.45                | -0.23     | -0.14          | -0.01          | 0.10      | -0.22      | 0.05           | -0.30 |
|              | Stroop (Congruent)   | -0.11      | 0.07  | 0.05                | -0.20     | -0.21          | -0.04          | 0.08      | -0.13      | -0.19          | -0.36 |
|              | Stroop (Incongruent) | -0.02      | 0.19  | -0.01               | -0.13     | -0.10          | 0.14           | 0.30      | 0.03       | -0.06          | -0.17 |
|              | SDMT                 | -0.39      | 0.17  | 0.03                | -0.37     | 0.03           | -0.05          | 0.16      | -0.04      | 0.20           | 0.03  |
|              | Word Association     | 0.08       | 0.37  | 0.14                | -0.08     | -0.37          | 0.11           | 0.07      | -0.12      | 0.12           | -0.12 |



**Supplementary Table 7.** Correlation in PLC in 15 HD between 18 behavioral measures which showed significant effects of Group or Alcohol and 10 ROIs which showed significant effects of Group or Alcohol. Significant correlations are highlighted in green ( $p < 0.01$ , two-tailed).

| Name of Test | IFCD                 |            |       |                     |           |                |                | gFCD      |            |                |       |
|--------------|----------------------|------------|-------|---------------------|-----------|----------------|----------------|-----------|------------|----------------|-------|
|              | Calcarine            | Cerebellum | PFC   | Posterior Cingulate | Precuneus | Thalamus (MDN) | Thalamus (VLN) | Calcarine | Cerebellum | Thalamus (VLN) |       |
| Drug Effects | Sedated              | 0.30       | 0.36  | -0.22               | -0.34     | -0.06          | 0.20           | 0.03      | 0.20       | 0.13           | -0.08 |
|              | Irritable            | 0.34       | 0.51  | 0.51                | 0.33      | 0.00           | 0.33           | -0.24     | 0.41       | 0.48           | 0.44  |
|              | Dizzy                | -0.12      | 0.61  | -0.28               | -0.16     | -0.03          | 0.25           | 0.18      | 0.10       | 0.33           | -0.15 |
|              | High                 | 0.27       | 0.51  | -0.27               | -0.01     | 0.14           | 0.39           | 0.16      | 0.13       | 0.37           | -0.15 |
|              | Pleasant             | 0.67       | 0.13  | 0.09                | -0.01     | 0.49           | 0.62           | 0.49      | 0.19       | 0.12           | 0.00  |
|              | Alcohol Desire       | -0.62      | -0.11 | -0.31               | -0.66     | -0.43          | -0.43          | -0.38     | -0.20      | -0.18          | -0.37 |
|              | Intoxication         | 0.29       | -0.09 | -0.16               | 0.10      | 0.13           | 0.17           | 0.02      | -0.16      | -0.05          | -0.18 |
|              | Restless             | -0.17      | 0.12  | 0.28                | 0.48      | -0.21          | 0.02           | -0.08     | 0.22       | 0.32           | 0.52  |
| Motor        | Gait (errors)        | 0.49       | 0.50  | -0.27               | -0.01     | 0.47           | 0.52           | 0.38      | 0.08       | 0.32           | -0.23 |
|              | One Leg (errors)     | 0.13       | 0.86  | -0.07               | -0.08     | 0.04           | 0.39           | 0.14      | 0.44       | 0.64           | 0.06  |
|              | Romberg (time)       | -0.11      | -0.70 | -0.29               | -0.48     | 0.08           | -0.42          | -0.21     | -0.70      | -0.79          | -0.64 |
|              | Romberg (errors)     | 0.05       | 0.02  | -0.22               | -0.38     | -0.15          | -0.08          | -0.21     | 0.14       | 0.06           | -0.09 |
|              | Rhythm (errors)      | 0.35       | -0.27 | 0.20                | -0.29     | 0.15           | 0.19           | 0.00      | 0.03       | -0.29          | -0.20 |
| Cognitive    | Stroop (Neutral)     | 0.20       | 0.30  | 0.30                | 0.56      | 0.19           | 0.19           | 0.07      | 0.02       | 0.27           | 0.36  |
|              | Stroop (Congruent)   | 0.16       | 0.56  | 0.33                | 0.58      | 0.00           | 0.30           | 0.20      | 0.41       | 0.57           | 0.62  |
|              | Stroop (Incongruent) | 0.12       | 0.53  | 0.18                | 0.52      | 0.09           | 0.29           | 0.32      | 0.30       | 0.48           | 0.48  |
|              | SDMT                 | -0.05      | 0.21  | 0.45                | 0.75      | 0.01           | 0.03           | -0.06     | 0.10       | 0.31           | 0.54  |
|              | Word Association     | 0.22       | -0.08 | 0.63                | 0.51      | 0.15           | 0.01           | -0.20     | 0.22       | 0.12           | 0.55  |

**Supplementary Table 8.** Correlation in ALC in 15 HD between 18 behavioral measures which showed significant effects of Group or Alcohol and 10 ROIs which showed significant effects of Group or Alcohol. Significant correlations are highlighted in green ( $p < 0.01$ , two-tailed).

| Name of Test | IFCD                 |            |       |                     |           |                |                | gFCD      |            |                |       |
|--------------|----------------------|------------|-------|---------------------|-----------|----------------|----------------|-----------|------------|----------------|-------|
|              | Calcarine            | Cerebellum | PFC   | Posterior Cingulate | Precuneus | Thalamus (MDN) | Thalamus (VLN) | Calcarine | Cerebellum | Thalamus (VLN) |       |
| Drug Effects | Sedated              | -0.42      | 0.02  | 0.27                | -0.09     | -0.28          | -0.09          | -0.02     | -0.55      | 0.00           | -0.14 |
|              | Irritable            | -0.37      | 0.04  | -0.02               | -0.03     | -0.40          | -0.26          | -0.20     | -0.48      | 0.05           | -0.16 |
|              | Dizzy                | -0.38      | -0.17 | -0.15               | 0.14      | -0.35          | 0.05           | 0.16      | -0.07      | -0.12          | 0.29  |
|              | High                 | -0.09      | -0.57 | -0.37               | 0.20      | -0.21          | 0.36           | 0.18      | -0.40      | -0.58          | -0.09 |
|              | Pleasant             | 0.04       | -0.15 | -0.15               | -0.01     | -0.02          | -0.45          | -0.55     | -0.10      | -0.13          | -0.33 |
|              | Alcohol Desire       | -0.43      | -0.09 | -0.23               | -0.34     | -0.29          | 0.13           | 0.12      | -0.27      | -0.16          | -0.02 |
|              | Intoxication         | -0.16      | 0.26  | 0.42                | 0.10      | -0.41          | -0.29          | -0.51     | -0.30      | 0.20           | -0.33 |
|              | Restless             | -0.29      | -0.02 | -0.25               | -0.10     | -0.33          | -0.27          | -0.12     | -0.01      | 0.02           | 0.04  |
| Motor        | Gait (errors)        | 0.15       | 0.26  | 0.66                | 0.09      | 0.16           | -0.19          | -0.26     | -0.35      | 0.19           | -0.34 |
|              | One Leg (errors)     | -0.03      | 0.61  | 0.81                | 0.13      | -0.17          | -0.19          | -0.31     | -0.27      | 0.52           | -0.39 |
|              | Romberg (time)       | 0.03       | -0.34 | 0.20                | 0.11      | 0.00           | 0.21           | 0.06      | -0.46      | -0.35          | -0.20 |
|              | Romberg (errors)     | 0.44       | 0.01  | 0.25                | 0.19      | 0.25           | 0.10           | -0.19     | -0.12      | -0.05          | -0.18 |
|              | Rhythm (errors)      | 0.04       | -0.31 | 0.23                | 0.07      | -0.04          | 0.02           | -0.12     | -0.28      | -0.33          | -0.23 |
| Cognitive    | Stroop (Neutral)     | -0.02      | 0.32  | 0.06                | 0.18      | -0.18          | 0.34           | 0.43      | 0.49       | 0.35           | 0.42  |
|              | Stroop (Congruent)   | -0.24      | 0.64  | 0.37                | -0.02     | -0.31          | -0.25          | -0.02     | 0.23       | 0.67           | 0.12  |
|              | Stroop (Incongruent) | -0.15      | 0.68  | 0.36                | 0.00      | -0.27          | -0.22          | -0.04     | 0.53       | 0.69           | 0.20  |
|              | SDMT                 | -0.19      | 0.19  | -0.07               | 0.00      | -0.38          | 0.32           | 0.39      | 0.67       | 0.28           | 0.75  |
|              | Word Association     | 0.03       | -0.16 | -0.17               | -0.10     | 0.02           | 0.16           | 0.19      | 0.57       | -0.07          | 0.51  |

**Supplementary Table 9.** Correlations in NM between changes in 18 behavioral measures and changes in 10 ROIs which showed significant effects of Group or Alcohol from PLC to ALC. Significant correlations are highlighted in green ( $p < 0.01$ , two-tailed).

| Name of Test | IFCD                 |            |       |                     |           |                |                | gFCD      |            |                |       |
|--------------|----------------------|------------|-------|---------------------|-----------|----------------|----------------|-----------|------------|----------------|-------|
|              | Calcarine            | Cerebellum | PFC   | Posterior Cingulate | Precuneus | Thalamus (MDN) | Thalamus (VLN) | Calcarine | Cerebellum | Thalamus (VLN) |       |
| Drug Effects | Sedated              | 0.56       | 0.22  | 0.16                | -0.07     | -0.11          | 0.27           | 0.12      | 0.32       | 0.18           | -0.03 |
|              | Irritable            | 0.40       | 0.02  | -0.25               | 0.48      | 0.33           | 0.20           | 0.12      | 0.09       | -0.11          | 0.15  |
|              | Dizzy                | 0.03       | -0.24 | -0.10               | 0.29      | 0.11           | -0.31          | -0.41     | -0.08      | -0.39          | -0.43 |
|              | High                 | 0.05       | -0.35 | 0.19                | -0.03     | -0.09          | 0.05           | -0.17     | -0.25      | -0.35          | -0.42 |
|              | Pleasant             | -0.19      | -0.03 | 0.34                | -0.37     | -0.26          | -0.03          | -0.04     | 0.10       | 0.18           | 0.15  |
|              | Alcohol Desire       | -0.15      | -0.10 | 0.12                | -0.38     | -0.59          | -0.16          | -0.39     | -0.27      | -0.06          | -0.41 |
|              | Intoxication         | -0.04      | -0.20 | 0.15                | 0.00      | -0.18          | 0.03           | -0.19     | -0.14      | -0.31          | -0.31 |
|              | Restless             | -0.21      | -0.03 | -0.01               | -0.05     | 0.05           | -0.11          | -0.10     | 0.05       | 0.07           | -0.01 |
| Motor        | Gait (errors)        | 0.28       | 0.07  | 0.24                | -0.16     | -0.29          | 0.27           | 0.14      | -0.11      | 0.16           | 0.01  |
|              | One Leg (errors)     | 0.16       | 0.29  | 0.09                | -0.22     | 0.10           | 0.17           | 0.05      | 0.14       | 0.19           | -0.32 |
|              | Romberg (time)       | -0.46      | 0.08  | 0.03                | 0.06      | -0.01          | -0.05          | -0.04     | -0.29      | 0.01           | -0.27 |
|              | Romberg (errors)     | 0.26       | 0.23  | 0.39                | -0.03     | 0.15           | 0.37           | 0.39      | 0.23       | 0.30           | 0.09  |
|              | Rhythm (errors)      | 0.22       | -0.05 | 0.08                | -0.57     | 0.00           | 0.28           | 0.29      | 0.33       | 0.24           | 0.37  |
| Cognitive    | Stroop (Neutral)     | 0.31       | -0.20 | 0.32                | 0.31      | -0.05          | 0.13           | 0.15      | 0.15       | -0.23          | 0.12  |
|              | Stroop (Congruent)   | -0.11      | -0.30 | 0.12                | 0.28      | -0.11          | -0.10          | -0.24     | -0.47      | -0.15          | -0.27 |
|              | Stroop (Incongruent) | 0.14       | 0.08  | 0.11                | 0.04      | -0.19          | 0.16           | 0.06      | -0.30      | 0.08           | -0.01 |
|              | SDMT                 | 0.00       | 0.07  | 0.07                | 0.45      | 0.13           | 0.22           | 0.02      | -0.02      | 0.20           | 0.10  |
|              | Word Association     | -0.30      | 0.23  | 0.04                | -0.06     | -0.11          | 0.02           | -0.09     | -0.49      | 0.09           | -0.47 |

**Supplementary Table 10.** Correlations in HD between changes in 18 behavioral measures and changes in 10 ROIs which showed significant effects of Group or Alcohol from PLC to ALC. Significant correlations are highlighted in green ( $p < 0.01$ , two-tailed).

| Name of Test | IFCD                 |            |       |                     |           |                |                | gFCD      |            |                |       |
|--------------|----------------------|------------|-------|---------------------|-----------|----------------|----------------|-----------|------------|----------------|-------|
|              | Calcarine            | Cerebellum | PFC   | Posterior Cingulate | Precuneus | Thalamus (MDN) | Thalamus (VLN) | Calcarine | Cerebellum | Thalamus (VLN) |       |
| Drug Effects | Sedated              | -0.14      | -0.02 | 0.11                | -0.08     | -0.31          | -0.03          | -0.07     | -0.21      | 0.23           | 0.07  |
|              | Irritable            | 0.16       | -0.35 | -0.28               | 0.16      | -0.03          | -0.09          | -0.31     | -0.16      | -0.11          | -0.19 |
|              | Dizzy                | 0.06       | -0.20 | -0.50               | -0.14     | -0.15          | 0.20           | 0.14      | 0.29       | 0.10           | 0.38  |
|              | High                 | 0.09       | -0.36 | -0.23               | 0.09      | -0.04          | 0.48           | 0.27      | 0.05       | 0.24           | 0.18  |
|              | Pleasant             | 0.36       | -0.04 | -0.12               | -0.26     | 0.48           | 0.06           | -0.03     | 0.13       | -0.12          | -0.06 |
|              | Alcohol Desire       | 0.01       | 0.12  | 0.35                | -0.11     | -0.14          | 0.39           | 0.44      | 0.29       | 0.37           | 0.44  |
|              | Intoxication         | -0.07      | 0.26  | 0.01                | -0.17     | -0.26          | -0.31          | -0.38     | -0.39      | -0.06          | -0.24 |
|              | Restless             | -0.07      | -0.36 | -0.14               | 0.08      | 0.20           | -0.17          | -0.19     | -0.43      | -0.34          | -0.53 |
| Motor        | Gait (errors)        | -0.36      | 0.13  | 0.09                | -0.09     | -0.53          | -0.34          | -0.30     | -0.42      | 0.09           | -0.25 |
|              | One Leg (errors)     | -0.14      | 0.34  | 0.38                | 0.05      | -0.22          | -0.26          | -0.26     | -0.39      | 0.14           | -0.34 |
|              | Romberg (time)       | -0.05      | 0.06  | 0.34                | 0.13      | 0.05           | -0.01          | -0.02     | -0.25      | 0.21           | -0.13 |
|              | Romberg (errors)     | 0.36       | 0.12  | 0.30                | 0.00      | -0.33          | 0.06           | -0.19     | 0.13       | 0.26           | 0.08  |
|              | Rhythm (errors)      | 0.12       | -0.19 | -0.22               | -0.08     | 0.02           | 0.09           | 0.05      | 0.05       | -0.12          | 0.01  |
| Cognitive    | Stroop (Neutral)     | 0.54       | -0.42 | -0.28               | 0.44      | 0.62           | 0.06           | -0.11     | 0.05       | -0.57          | -0.33 |
|              | Stroop (Congruent)   | -0.02      | -0.62 | -0.31               | 0.45      | 0.18           | 0.01           | -0.11     | -0.47      | -0.50          | -0.27 |
|              | Stroop (Incongruent) | 0.61       | -0.14 | -0.45               | 0.13      | 0.48           | -0.18          | -0.32     | 0.13       | -0.80          | -0.32 |
|              | SDMT                 | 0.38       | -0.55 | -0.36               | 0.41      | 0.58           | 0.26           | 0.15      | 0.08       | -0.60          | -0.10 |
|              | Word Association     | 0.62       | -0.30 | 0.30                | 0.34      | 0.52           | 0.22           | 0.06      | 0.39       | 0.02           | -0.19 |

## References

1. Lancaster JL, Woldorff MG, Parsons LM, Liotti M, Freitas CS, Rainey L *et al.* Automated Talairach atlas labels for functional brain mapping. *Human brain mapping* 2000; **10**(3): 120-131.
2. Maldjian JA, Laurienti PJ, Kraft RA, Burdette JH. An automated method for neuroanatomic and cytoarchitectonic atlas-based interrogation of fMRI data sets. *NeuroImage* 2003; **19**(3): 1233-1239.
3. Oscar-Berman M, Marinkovic K. Alcoholism and the brain: an overview. *Alcohol research & health: the journal of the National Institute on Alcohol Abuse and Alcoholism* 2003; **27**(2): 125.
4. Volkow ND, Mullani N, Gould L, Adler SS, Guynn RW, Overall JE *et al.* Effects of acute alcohol intoxication on cerebral blood flow measured with PET. *Psychiatry research* 1988; **24**(2): 201-209.
5. Harris GJ, Oscar-Berman M, Gansler A, Streeter C, Lewis RF, Ahmed I *et al.* Hypoperfusion of the cerebellum and aging effects on cerebral cortex blood flow in abstinent alcoholics: a SPECT study. *Alcoholism: Clinical and Experimental Research* 1999; **23**(7): 1219-1227.
6. Qin L, Crews FT. Focal thalamic degeneration from ethanol and thiamine deficiency is associated with neuroimmune gene induction, microglial activation, and lack of monocarboxylic acid transporters. *Alcoholism: Clinical and Experimental Research* 2014; **38**(3): 657-671.
7. Abernathy K, Chandler LJ, Woodward JJ. Alcohol and the prefrontal cortex. *International review of neurobiology* 2010; **91**: 289-320.
8. Kong L, Zheng W, Lian G, Zhang H. Acute effects of alcohol on the human brain: diffusion tensor imaging study. *American Journal of Neuroradiology* 2012; **33**(5): 928-934.
